# Supplementary material for: The Efficacy of Manual Therapy Approaches on Pain, Maximum Mouth Opening and Disability in Temporomandibular Disorders: A Systematic Review of Randomised Controlled Trials
Source: MDPI journal article supplement (doi:10.3390/life13020292), 2023-01-20
Supplement: s1 [file s1]

## **Supplementary material S2. Search strategy conducted on October 3<sup>rd</sup> 2022**

### ***OID (MEDLINE, COCHRANE, EMBASE, AMED)***

1. randomised controlled trial\*.mp. [mp=ab, hw, ti, tn, ot, dm, mf, dv, kf, fx, dq, bt, nm, ox, px, rx, ui, sy, sh, kw, tx, ct]
2. Randomized Controlled Trial.mp. [mp=ab, hw, ti, tn, ot, dm, mf, dv, kf, fx, dq, bt, nm, ox, px, rx, ui, sy, sh, kw, tx, ct]
3. random allocation.mp. [mp=ab, hw, ti, tn, ot, dm, mf, dv, kf, fx, dq, bt, nm, ox, px, rx, ui, sy, sh, kw, tx, ct]
4. Comparative Stud\*.mp. [mp=ab, hw, ti, tn, ot, dm, mf, dv, kf, fx, dq, bt, nm, ox, px, rx, ui, sy, sh, kw, tx, ct]
5. Controlled Clinical Trial\*.mp. [mp=ab, hw, ti, tn, ot, dm, mf, dv, kf, fx, dq, bt, nm, ox, px, rx, ui, sy, sh, kw, tx, ct]
6. double-blind method\*.mp. [mp=ab, hw, ti, tn, ot, dm, mf, dv, kf, fx, dq, bt, nm, ox, px, rx, ui, sy, sh, kw, tx, ct]
7. single-blind method\*.mp. [mp=ab, hw, ti, tn, ot, dm, mf, dv, kf, fx, dq, bt, nm, ox, px, rx, ui, sy, sh, kw, tx, ct]
8. Clinical Trial\*.mp. [mp=ab, hw, ti, tn, ot, dm, mf, dv, kf, fx, dq, bt, nm, ox, px, rx, ui, sy, sh, kw, tx, ct]
9. crossover stud\*.mp. [mp=ab, hw, ti, tn, ot, dm, mf, dv, kf, fx, dq, bt, nm, ox, px, rx, ui, sy, sh, kw, tx, ct]
10. 1 or 2 or 3 or 4 or 5 or 6 or 7 or 8 or 9
11. temporomandibular.mp. [mp=ab, hw, kw, ti, ot, tn, dm, mf, dv, kf, fx, dq, bt, nm, ox, px, rx, an, ui, sy, sh, tx, ct]
12. temporomandibular disorder\*.mp. [mp=ab, hw, kw, ti, ot, tn, dm, mf, dv, kf, fx, dq, bt, nm, ox, px, rx, an, ui, sy, sh, tx, ct]
13. 11 or 12
14. 10 and 13

### ***PEDro***

Abstract & Title: temporomandibular

Therapy: not applicable

Problem: not applicable

Body Part: head or neck

Subdiscipline: not applicable

Topic: not applicable

Method: not applicable

Author/Association: not applicable

Title Only: not applicable

Source: not applicable

Published Since: not applicable

New records added since: not applicable

Score of at least: not applicable
