# Supplementary material for: The Efficacy of Manual Therapy Approaches on Pain, Maximum Mouth Opening and Disability in Temporomandibular Disorders: A Systematic Review of Randomised Controlled Trials
Source: MDPI journal article supplement (doi:10.3390/life13020292), 2023-01-20
Supplement: s1 [file s1]

## Supplementary file S4: Manual therapy modalities subgroup analysis on pain intensity

### Pain intensity - Additional effects of manual therapy - Subgroup analysis

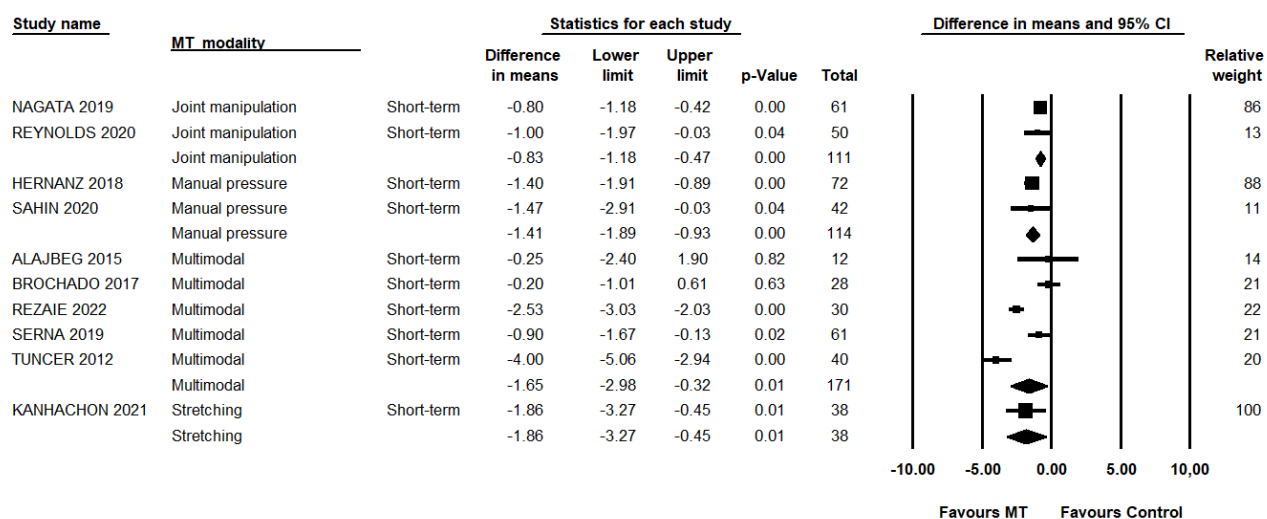

Random-Effects Model; MT = Manual Therapy
