# Supplementary material for: The Efficacy of Manual Therapy Approaches on Pain, Maximum Mouth Opening and Disability in Temporomandibular Disorders: A Systematic Review of Randomised Controlled Trials
Source: MDPI journal article supplement (doi:10.3390/life13020292), 2023-01-20
Supplement: s1 [file s1]

### Supplementary file S3: Funnel Plot

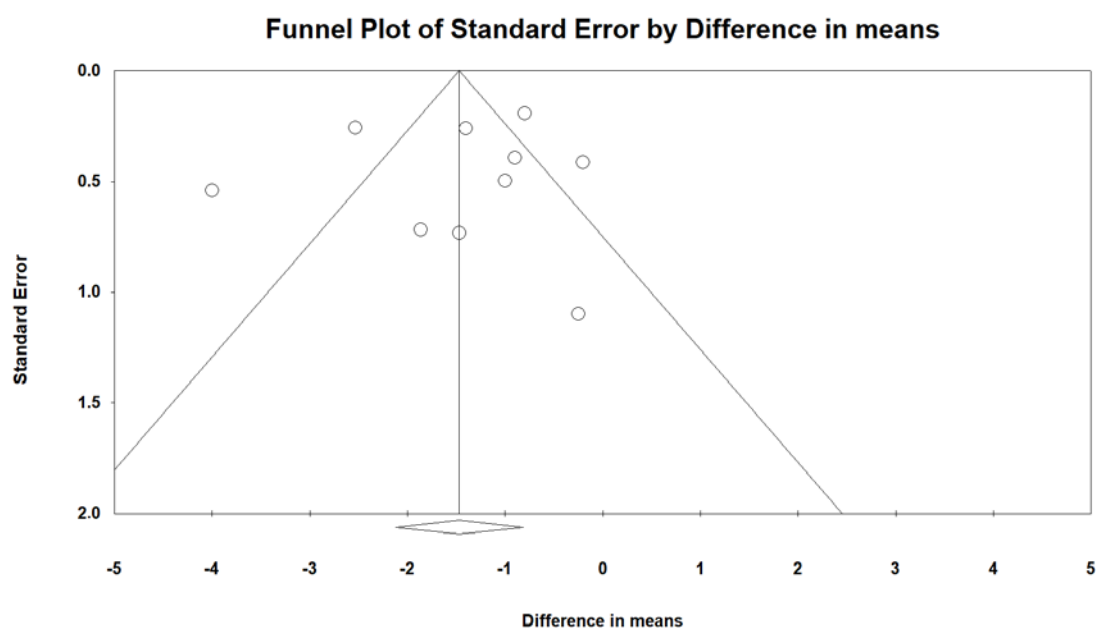

#### Egger's regression intercept

Intercept -0.69;

Standard error 1.81;

95% lower limit (2-tailed) -4.80;

95% upper limit (2-tailed) 3.41;

t-value 0.38; df 9.0;

P-value (1-tailed) 0.35;

P-value (2-tailed) 0.71.
